# Supplementary material for: Association of Placental Pathology and antibiotic exposure after birth with the Severity of Necrotizing Enterocolitis in Preterm infants - A Matched Case-Control Study
Source: Research Square preprint supplement (doi:10.21203/rs.3.rs-5717937/v1), 2025-02-04
Supplement: Supplementary file 1 [file a2f74066bc9cd461de3cf429.docx]

| Supplemental Table 1: NEC features and antibiotic exposure duration in surgical NEC cohort: | | | | |
| --- | --- | --- | --- | --- |
|  | **[ALL] N=43** | **Antibiotic =<3 N=13** | **>3 N=30** | **p value** |
| Nec age onset | 15.0 [7.50;29.0] | 5.00 [4.00;19.0] | 18.0 [9.25;34.0] | 0.002 |
| Pneumatosis |  |  |  | 1.000 |
| No | 25 (58.1%) | 8 (61.5%) | 17 (56.7%) |  |
| Yes | 18 (41.9%) | 5 (38.5%) | 13 (43.3%) |  |
| PortaL venous gas | 0.12 (0.32) | 0.08 (0.28) | 0.13 (0.35) | 0.575 |
| Pneumoperitoneum |  |  |  | 0.333 |
| No | 23 (53.5%) | 5 (38.5%) | 18 (60.0%) |  |
| Yes | 20 (46.5%) | 8 (61.5%) | 12 (40.0%) |  |
| length of bowel resected | 17.1 (16.4) | 20.0 (22.2) | 16.0 (13.7) | 0.570 |
| Region of bowel resected |  |  |  | 1.000 |
| Both | 12 (33.3%) | 4 (36.4%) | 8 (32.0%) |  |
| Large bowel | 1 (2.78%) | 0 (0.00%) | 1 (4.00%) |  |
| Small bowel | 23 (63.9%) | 7 (63.6%) | 16 (64.0%) |  |
| CRP on NEC onset | 1.30 [0.80;4.62] | 0.70 [0.50;1.10] | 2.60 [1.10;6.00] | 0.003 |
| Positive blood culture sepsis |  |  |  | 0.290 |
| No | 31 (72.1%) | 11 (84.6%) | 20 (66.7%) |  |
| Yes | 12 (27.9%) | 2 (15.4%) | 10 (33.3%) |  |
| Time to reach full feeds | 55.0 [31.0;88.0] | 62.0 [37.0;88.0] | 53.0 [28.2;85.8] | 0.632 |
| Day of starting feeds | 15.0 [10.0;20.8] | 9.00 [8.00;14.5] | 16.5 [13.5;21.8] | 0.058 |
| Parenteral nutrition days | 83.0 [53.5;117] | 65.0 [53.0;105] | 99.0 [55.0;118] | 0.558 |
| Postoperative Ileus days | 14.0 [9.00;20.0] | 7.00 [7.00;12.0] | 16.0 [12.5;21.0] | 0.021 |
| White matter injury on brain MRI at 36 weeks |  |  |  | 0.114 |
| No | 16 (57.1%) | 3 (33.3%) | 13 (68.4%) |  |
| Yes | 12 (42.9%) | 6 (66.7%) | 6 (31.6%) |  |
